# Supplementary material for: CdTe-QDs Affect Reproductive Development of Plants through Oxidative Stress
Source: MDPI journal article supplement (doi:10.3390/toxics11070585), 2023-07-05
Supplement: s1 [file s1]

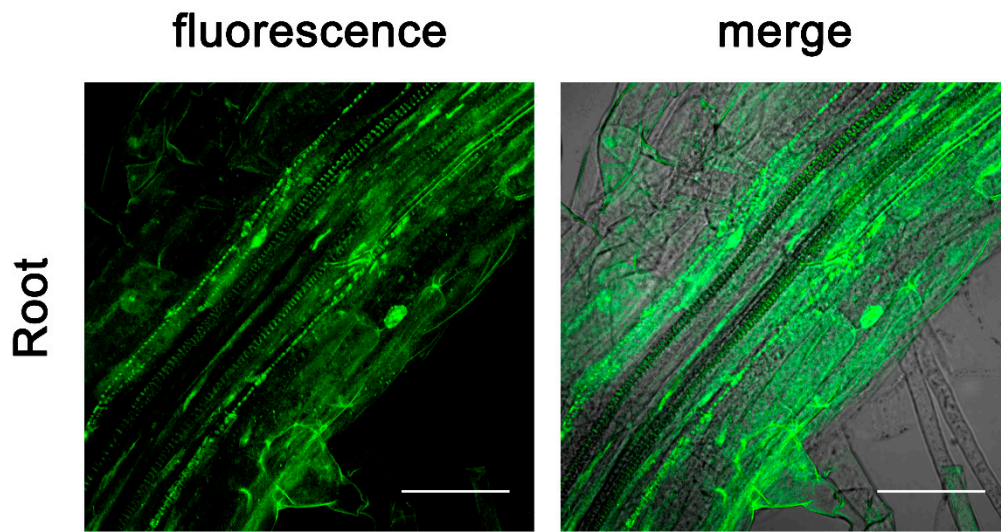

**Figure. S1** The distribution of QDs can be observed in *Arabidopsis thaliana* roots by irrigating CdTe-QDs. Bars = 50 $\mu$ m.

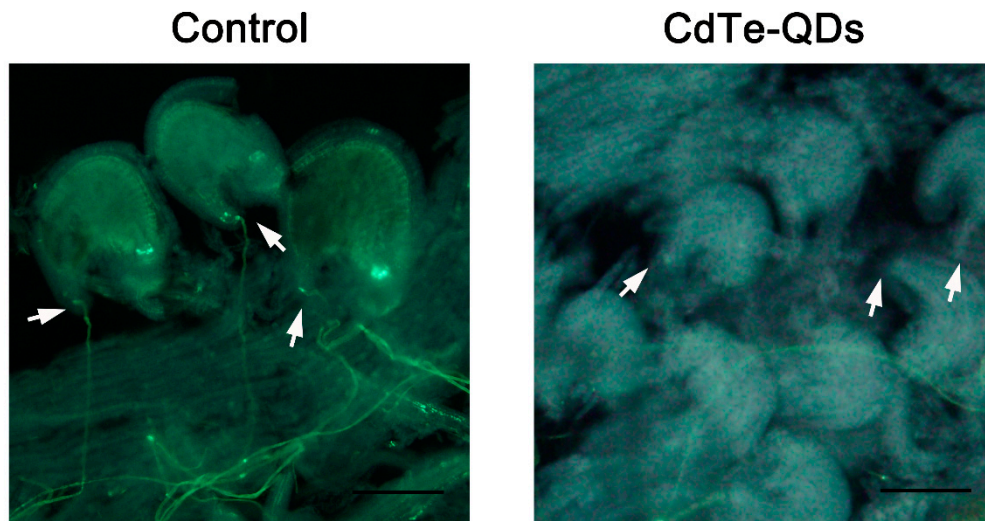

**Figure. S2** Effect of CdTe-QDs on the growth of pollen tube of *Arabidopsis thaliana*. The pollen tube of QDs treatment group could not reach ovule normally to complete fertilization. Bars = 200 $\mu$ m.

**Supplemental Table S1:** list of primers used in this study.

| Primer   | Sequence                       |
|----------|--------------------------------|
| SOG1-F   | AGTGGTGTGGAAGAGCAACC           |
| SOG1-R   | GCAATCCTGGCCAATCATCAA          |
| SMR5-F   | CAGCATATCCGCCTTGTCCA           |
| SMR5-R   | CTGCTACCACCGAGAAGAACAAGT       |
| PARP2-F  | ATCGGAGGTGATTGATCGGTATG        |
| PARP2-R  | AAATCATGAGGTATCACTGTGTAGAACTCT |
| BRCA1-F  | GTGAACCTGTCTCTGCGGAT           |
| BRCA1-R  | TCCGGCTTCTTGTCAACTCC           |
| RAD51-F  | GTCCAACAACAAGACGATGAAGAA       |
| RAD51-R  | AACAGAAGCAATACCTGCTGCC         |
| RBOHD-F  | AACTCTCCGCTGATTCCAACG          |
| RBOHD-R  | TGGTCAGCGAAGTCTTTAGATTCCCT     |
| APX2-F   | TTGCTGTTGAGATCACTGGAGGA        |
| APX2-R   | TGAGGCAGACGACCTTCAGG           |
| OXI1-F   | TAGAGGATCGAACCGGAAAG           |
| OXI1-R   | GACCCTTGATTTCTCAACG            |
| MPK3-F   | GACGTTTGACCCCAACAGAA           |
| MPK3-R   | TGGCTTTTGACAGATTGGCTC          |
| MPK6-F   | TAAGTCCCCGACAGTGCATCC          |
| MPK6-R   | GATGGGCCAATGCGTCTAA            |
| ACS2-F   | CATGTTCTGCCTTGCGGATC           |
| ACS2-R   | ACCTGTCCGCCACCTCAAGT           |
| GSH2-F   | GGACTCGTCGTTGGTGACAA           |
| GSH2-R   | TCTGGGAATGCAGTTGGTAGC          |
| PCNA1-F  | GCAAAGATCTCAGTAGCATTGG         |
| PCNA1-R  | CGATAAGCTGATTGTCACTGTG         |
| PCNA2-F  | GAAGTTTTCAACAGCAGGTGAT         |
| PCNA2-R  | CTTCTTCTTCAATCTTAGGCGC         |
| Actin7-F | AGGCACCTCTTAACCCTAAAGC         |
| Actin7-R | GGACAACGGAATCTCTCAGC           |
